# Supplementary material
Source: PubMed Central journal article supplement (PMC3912546)

**Author title:** Absence of P-glycoprotein Transport in the Pharmacokinetics and Toxicity of the Herbicide Paraquat

**Authors' names:** Lacher SE, Gremaud JN, Skagen K, Steed E, Dalton R, Sugden KD, Cardozo-Pelaez F, Sherwin CMT, Woodahl EL

**Journal name:** Journal of Pharmacology and Experimental Therapeutics

**Supplemental Figure 3. Comparison of pharmacokinetic model conditional weighted residuals vs. population predicted paraquat concentrations in FVB wild-type (Panel A) and *mdr1a*<sup>(-/-)</sup>/*1b*<sup>(-/-)</sup> (Panel B) mice.** Paraquat final model conditional weighted residuals versus population predicted concentrations. The short line represents the regression line of the data.

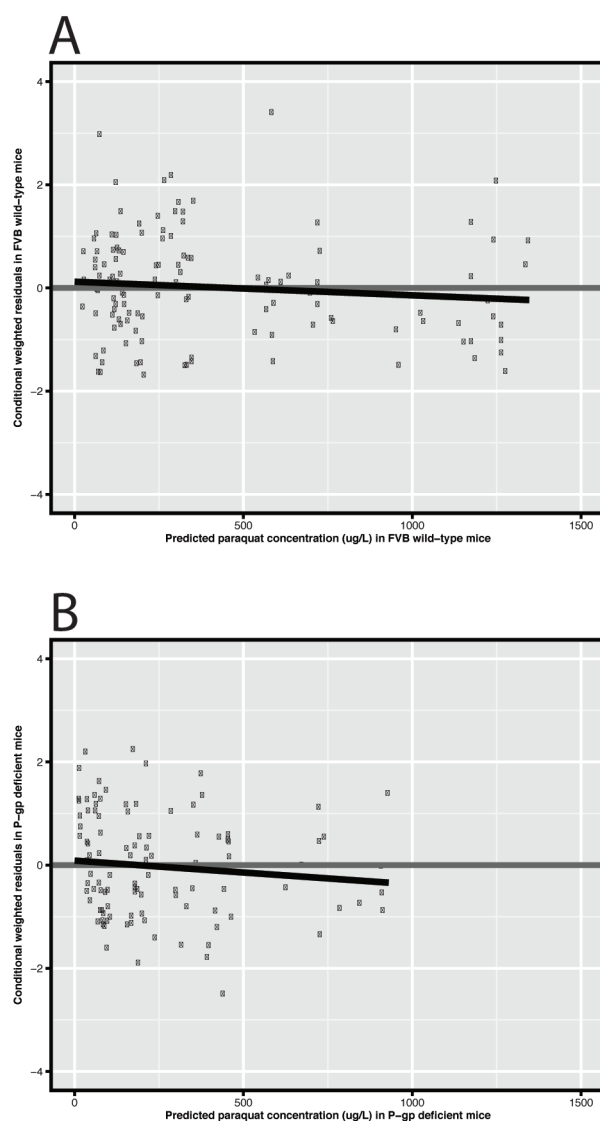

Supplement: supp_113.209791_209791Supplemental_Figure_3.pdf [file supp_113.209791_209791Supplemental_Figure_3.pdf]
