# Supplementary material
Source: PubMed Central journal article supplement (PMC3912546)

**Author title:** Absence of P-glycoprotein Transport in the Pharmacokinetics and Toxicity of the Herbicide Paraquat

**Authors' names:** Lacher SE, Gremaud JN, Skagen K, Steed E, Dalton R, Sugden KD, Cardozo-Pelaez F, Sherwin CMT, Woodahl EL

**Journal name:** Journal of Pharmacology and Experimental Therapeutics

**Supplemental Figure 5. Comparison of visual predicted checks for paraquat concentrations in FVB wild-type (Panel A) and *mdr1a*<sup>-/-</sup>/*1b*<sup>-/-</sup> (Panel B) mice.** Visual predictive check for final model, paraquat observed data compared with the 95th, 50th and 5th percentiles for 100 simulated data sets. Observed data for 8 hours. Comparison of median (middle line) and 5th–95th percentile interval (bottom and top lines).

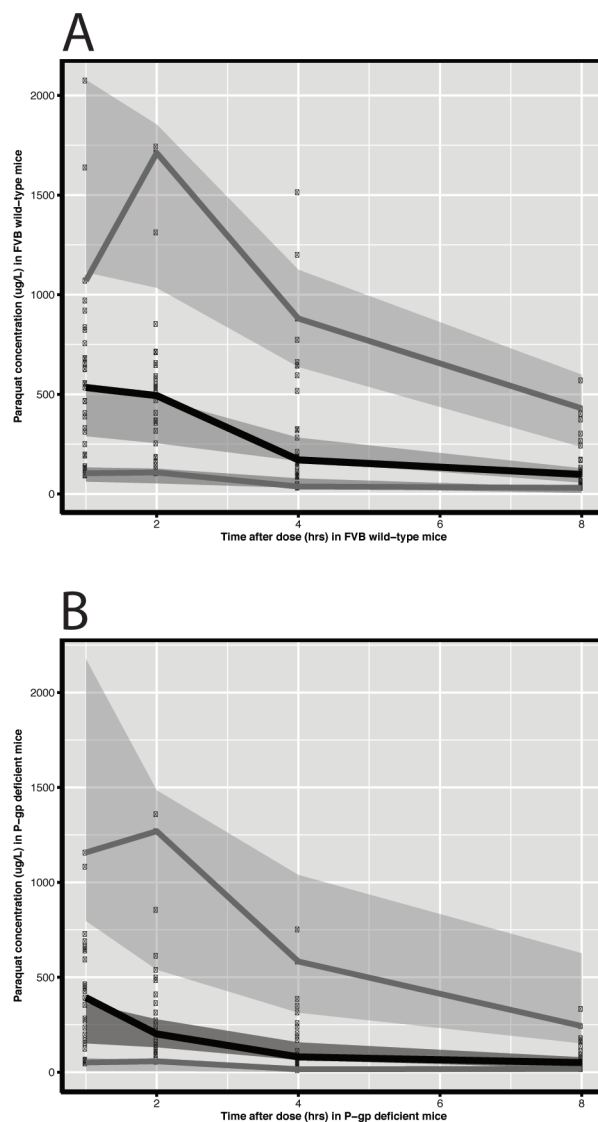

Supplement: supp_113.209791_209791Supplemental_Figure_5.pdf [file supp_113.209791_209791Supplemental_Figure_5.pdf]
