# Supplementary material
Source: PubMed Central journal article supplement (PMC3912546)
Supplement: supp_113.209791_209791Supplemental_Table_1.pdf [file supp_113.209791_209791Supplemental_Table_1.pdf]

**Author title:** Absence of P-glycoprotein Transport in the Pharmacokinetics and Toxicity of the Herbicide Paraquat

**Authors' names:** Lacher SE, Gremaud JN, Skagen K, Steed E, Dalton R, Sugden KD, Cardozo-Pelaez F, Sherwin CMT, Woodahl EL

**Journal name:** Journal of Pharmacology and Experimental Therapeutics

**Supplemental Table 1: Non-compartmental pharmacokinetic analysis of paraquat in FVB wild-type and *mdr1a*<sup>(-/-)</sup>/*1b*<sup>(-/-)</sup> mice following a single paraquat oral dose**

|                                      | FVB wild-type (n=34) | <i>mdr1a</i> <sup>(-/-)</sup> / <i>1b</i> <sup>(-/-)</sup> (n=28) |
|--------------------------------------|----------------------|-------------------------------------------------------------------|
|                                      | mean ± s.d.          | mean ± s.d.                                                       |
| <b>C<sub>max</sub> (µg/L)</b>        | 659 ± 552            | 485 ± 462                                                         |
| <b>C<sub>max_D</sub> (µg/L/µg)</b>   | 0.49 ± 0.20          | 0.34 ± 0.20                                                       |
| <b>t<sub>max</sub> (hr)</b>          | 1.8 ± 0.85           | 1.36 ± 0.50                                                       |
| <b>AUC<sub>0-8hr</sub> (hr*µg/L)</b> | 2564 ± 2255          | 1584 ± 1505                                                       |
| <b>MRT<sub>0-8hr</sub> (hr)</b>      | 2.8 ± 0.6            | 2.9 ± 0.8                                                         |
| <b>t<sub>1/2</sub> (hr)</b>          | 3.3 ± 1.6            | 6.1 ± 4.7                                                         |
| <b>CL/F (L/hr)</b>                   | 0.56 ± 0.20          | 0.9 ± 0.6                                                         |
| <b>V/F (L)</b>                       | 2.5 ± 0.90           | 7.5 ± 8.1                                                         |

C<sub>max</sub>: maximum observed concentration; C<sub>max\_D</sub>: maximum observed concentration divided by dose; t<sub>max</sub>: time of maximum observed concentration; AUC<sub>0-8hr</sub>: area under the plasma concentration-time curve from the time of dosing to the last measurable concentration (0-8 hr); MRT<sub>0-8hr</sub>: mean residence time from the time of dosing to the time of the last measurable concentration (0-8 hr); t<sub>1/2</sub>: elimination half-life; CL/F: apparent oral clearance; V: apparent volume of distribution
